# Supplementary material for: Identification of a hot-spot to enhanceCandida rugosalipase thermostability by rational design methods
Source: Royal Society of Chemistry journal article supplement (doi:10.1039/c7ra11679a), 2018-01-01
Supplement: c7ra11679a1.pdf [file c7ra11679a1.pdf]

**Supplementary materials**

**Identification of a hot–spot to enhance *Candida rugosa* lipase thermostability by rational design methods**

Guanlin Li, Yuan Chen, Xingrong Fang, Feng Su, Li Xu\*, Yunjun Yan\*

Key Laboratory of Molecular Biophysics, the Ministry of Education; College of Life Science and Technology, Huazhong University of Science and Technology, Wuhan 430074, P. R. China

**Corresponding Authors:** Li Xu, Yunjun Yan

\*Tel/Fax: +86-27-87792213

E-mail: [xuli@hust.edu.cn](mailto:xuli@hust.edu.cn); [yanyunjun@hust.edu.cn](mailto:yanyunjun@hust.edu.cn)

**DOC S1 The codon-optimized gene sequence of wild-type Lip1**

ATGGAGCTCGCTCTTGCGCTCTCTCATTGCCTCGGTGGCTGCTGCCCCCT  
ACTGCTACTCTTGCTAACGGTGACACTATCACAGGTCTTAACGCTATTATC  
AACGAAGCCTTTTTGGGTATTCCTTTTGCCGAACCACCTGTTGGTAATCTT  
AGATTCAAGGATCCAGTCCCTTACTCCGGATCATTGGACGGTCAAAAATT  
CACTTCTTATGGACCATCTTGTATGCAACAGAACCCTGAGGGTACATACG  
AAGAGAATTTGCCAAAGGCTGCCTTGGATCTTGTATGCAGTCCAAAGTTT  
TTGAAGCTGTCTCTCCTTCTTCCGAGGATTGCTTGACAATTAACGTTGTCA  
GACCACCTGGAACCAAGGCCGGTGCAAATCTTCCAGTCATGTTGTGGATC  
TTTGGTGGAGGTTTCGAAGTTGGAGGTACCTCTACTTTTCCACCTGCCCAA  
ATGATTACTAAGTCCATCGCAATGGGTAAACCTATTATCCATGTTTCAGTC  
AACTATAGAGTTTCAAGTTGGGGATTCTTGGCTGGAGATGAAATTAAGGC  
CGAGGGATCTGCTAACGCCGGTCTTAAAGACCAAAGATTGGGTATGCAGT  
GGGTTGCTGATAATATTGCAGCTTTTGGAGGTGACCCAACAAAGGTCACC  
ATCTTCGGAGAGTCTGCTGGTAGTATGTCTGTTATGTGTCACATTTTGTGG  
AACGATGGAGACAATACTTACAAGGGTAAACCATTGTTTAGAGCTGGAAT  
CATGCAATCTGGTGCAATGGTTCCTTCTGATGCTGTTGATGGAATCTACGG  
TAACGAAATCTTCGATTTGCTTGCTTCTAATGCCGGATGTGGTTCCGCCTC  
AGACAAATTGGCATGCCTTAGAGGAGTTTCTTCCGATACATTGGAGGACG  
CAACTAACAATACACCAGGTTTTCTTGCTTACTCAAGTTTGAGACTTTCTT  
ATTTGCCAAGACCTGATGGTGTTAATATTACTGATGACATGTACGCTTTGG  
TCAGAGAGGGAAAGTATGCCAACATCCCTGTTATTATCGGAGATCAGAAT  
GACGAGGGAACCTTTCTTTGGTACATCTTCTTTGAACGTCACTACAGATGCA  
CAAGCTAGAGAATACTTTAAACAGTCTTTCGTTTCATGCATCAGATGCTGA  
GATTGACACCTTGATGACTGCTTATCCAGGAGATATTACACAAGGTTCTCC  
TTTTGACACCGGTATCTTGAACGCCCTTACTCCACAGTTCAAAGAATTTT  
TGCAGTTTTGGGAGATCTTGGTTTTACTCTTGCTAGAAGATACTTCTTGAA  
CCATTACACAGGAGGTACCAAGTACTCCTTCTTGTCTAAACAATTGTCTGG  
ACTTCCTGTCTTGGGTACTTTTCACTCAAACGATATTGTTTTCCAGGACTA  
CTTGCTTGGAAGTGGTTCTTTGATCTACAACAATGCCTTTATCGCCTTCGC

AACCGATTTGGACCCAAACACTGCTGGATTGCTTGTTAAGTGGCCTGAAT  
ACACCTCAAGTTCTCAATCTGGTAACAATTTGATGATGATCAACGCTTTGG  
GACTTTATACTGGTAAAGATAACTTTAGAACTGCTGGATACGACGCTCTTT  
TTAGTAACCCACCTTCTTTCTTTGTCTAA

## **DOC S2 The running script of FoldX**

```
<TITLE>FOLDX_runscript;  
<JOBSTART>#;  
<PDBS>1CRL.pdb;  
<BATCH>#;  
<COMMANDS>FOLDX_commandfile;  
<RepairPDB>#;  
<BuildModel>#,individual_list.txt;  
<END>#;  
<OPTIONS>FOLDX_optionfile;  
<Temperature>313;  
<R>#;  
<pH>8;  
<IonStrength>0.050;  
<water>-CRYSTAL;  
<metal>-CRYSTAL;  
<VdWDesign>2;  
<OutPDB>>false;  
<pdb_hydrogens>>false;  
<complex_with_DNA> true;  
<moveNeighbours>true;  
<numberOfRuns>5;  
<END>#;  
<JOBEND>#;  
<ENDFILE>#;
```

## **DOC S3 The script for pre-minimization and prediction in Rosetta**

### **ddg\_monomer algorithm**

#### **(a) Pre\_minimization**

/path/to/minimize\_with\_cst.linuxgccrelease

-in:file:l1st

-in:file:fullatom

-ignore\_unrecognized\_res

-fa\_max\_dis 9.0

-database /path/to/rosetta/main/database/

-ddg::harmonic\_ca\_tether 0.5

-score:weights standard\_plus\_score12

-ddg::constraint\_weight 1.0

-ddg::out\_pdb\_prefix min\_cst\_0.5

-ddg::sc\_min\_only false

score:patch/rosetta/main/database/scoring/weights/score12.wts\_patch>1CRL\_A\_min  
st.log

#### **(b) Prediction**

-in:file:s 1CRL\_A.pdb

-resfile 1CRL\_A\_1.resfile

-ddg:weight\_file soft\_rep\_design

-database /patch rosetta /main/database/

-score:fa\_max\_dis 9.0

-ddg:iterations 50

-ddg:dump\_pdbs true

-ignore\_unrecognized\_res

-ddg:local\_opt\_only true

-ddg:suppress\_checkpointing true

-in:file:fullatom

-ddg:mean true

-ddg:min false

-mute all #  
-ddg:ramp\_repulsive false  
-ddg:output\_silent true  
-ddg:opt\_radius 8.0  
-ddg:min\_cst false  
-ddg:sc\_min\_only false  
-ddg:ramp\_repulsive false

**Table S1 Stable Mutants identified by FoldX<sup>a</sup>**

| Mutants                  | FoldX (kcal/mol) | Mutants      | FoldX (kcal/mol) | Mutants      | FoldX (kcal/mol) |
|--------------------------|------------------|--------------|------------------|--------------|------------------|
| <b>E341N<sup>b</sup></b> | <b>-6.42</b>     | N468M        | -1.07            | I253M        | -0.35            |
| <b>D457F</b>             | <b>-6.08</b>     | S527R        | -1.04            | N20R         | -0.33            |
| <b>D457Y</b>             | <b>-4.99</b>     | <b>A190W</b> | <b>-1.00</b>     | S131Q        | -0.30            |
| <b>D457M</b>             | <b>-4.95</b>     | Y522F        | -0.96            | T493D        | -0.29            |
| <b>D457L</b>             | <b>-4.73</b>     | <b>S159G</b> | <b>-0.92</b>     | <b>T130A</b> | <b>-0.28</b>     |
| <b>G414W</b>             | <b>-4.40</b>     | V81K         | -0.88            | R279E        | -0.26            |
| <b>D457W</b>             | <b>-4.21</b>     | N528R        | -0.85            | P92R         | -0.24            |
| <b>S365M</b>             | <b>-3.64</b>     | <b>T13K</b>  | <b>-0.82</b>     | G383M        | -0.22            |
| <b>S365L</b>             | <b>-3.44</b>     | D10L         | -0.78            | G46C         | -0.21            |
| A22L                     | -2.70            | Q137P        | -0.75            | L399M        | -0.20            |
| <b>E66F</b>              | <b>-2.63</b>     | <b>S531R</b> | <b>-0.72</b>     | A398R        | -0.18            |
| <b>S365I</b>             | <b>-2.57</b>     | V323I        | -0.69            | N155T        | -0.17            |
| <b>A190F</b>             | <b>-2.09</b>     | Q187Y        | -0.66            | F391D        | -0.16            |
| <b>S93I</b>              | <b>-1.91</b>     | <b>E373W</b> | <b>-0.64</b>     | T493H        | -0.14            |
| <b>T140M</b>             | <b>-1.86</b>     | <b>E257Y</b> | <b>-0.63</b>     | A7H          | -0.13            |
| F391N                    | -1.73            | S464M        | -0.60            | T427H        | -0.12            |
| N451L                    | -1.60            | Q63L         | -0.56            | A4C          | -0.11            |
| <b>T476V</b>             | <b>-1.59</b>     | <b>D40W</b>  | <b>-0.54</b>     | L465M        | -0.10            |
| Q240M                    | -1.44            | S495N        | -0.51            | D225H        | -0.09            |
| <b>A110P</b>             | <b>-1.40</b>     | Y361M        | -0.50            | E172G        | -0.07            |
| L478K                    | -1.37            | T519R        | -0.46            | S270G        | -0.06            |
| A165P                    | -1.32            | V189M        | -0.44            | N226V        | -0.05            |
| <b>E257W</b>             | <b>-1.28</b>     | G461M        | -0.42            | I219L        | -0.04            |
| H218L                    | -1.22            | S272Y        | -0.41            | N265R        | -0.03            |
| W161P                    | -1.16            | A263N        | -0.39            | N155S        | -0.01            |
| S495F                    | -1.12            | K52L         | -0.36            |              |                  |

<sup>a</sup> FoldX returns negative value for stabilizing mutations. The greater the absolute value, the greater likelihood to be more stable.

<sup>b</sup> Stable mutants identified by both Rosetta and FoldX were shown in bold.

**Table S2 Stable Mutants identified by Rosetta ddg\_monomer<sup>a</sup>**

| Mutants      | Rosetta (kcal/mol) | Mutants      | Rosetta (kcal/mol) | Mutants      | Rosetta (kcal/mol) | Mutants      | Rosetta (kcal/mol) | Mutants      | Rosetta (kcal/mol) |
|--------------|--------------------|--------------|--------------------|--------------|--------------------|--------------|--------------------|--------------|--------------------|
| <b>D457F</b> | <b>-12.412</b>     | D340T        | -2.558             | S433A        | -1.545             | D318W        | -0.941             | <b>T130A</b> | <b>-0.209</b>      |
| <b>D457Y</b> | <b>-11.955</b>     | D340C        | -2.524             | I374L        | -1.535             | E71S         | -0.932             | D479T        | -0.190             |
| <b>D457W</b> | <b>-10.026</b>     | G280K        | -2.457             | S84L         | -1.524             | <b>S93I</b>  | <b>-0.913</b>      | T379K        | -0.164             |
| D457H        | -9.114             | E70T         | -2.438             | E70N         | -1.511             | H425K        | -0.888             | S47Y         | -0.145             |
| <b>D457M</b> | <b>-5.513</b>      | E21I         | -2.419             | E70C         | -1.494             | K147W        | -0.886             | V90A         | -0.137             |
| <b>E373W</b> | <b>-5.078</b>      | D375T        | -2.411             | N256V        | -1.479             | E360T        | -0.875             | N101F        | -0.129             |
| <b>S365L</b> | <b>-5.008</b>      | <b>E341N</b> | <b>-2.397</b>      | K170Q        | -1.453             | D452E        | -0.863             | V33I         | -0.108             |
| <b>D457L</b> | <b>-4.706</b>      | E491I        | -2.336             | D477H        | -1.434             | E325T        | -0.843             | T482Q        | -0.092             |
| <b>E257W</b> | <b>-4.315</b>      | R405W        | -2.280             | <b>S531R</b> | <b>-1.411</b>      | T379L        | -0.820             | S450C        | -0.086             |
| <b>S365M</b> | <b>-4.021</b>      | T68C         | -2.220             | L478F        | -1.391             | L78M         | -0.796             | I374W        | -0.064             |
| <b>S365I</b> | <b>-3.952</b>      | <b>A110P</b> | <b>-2.149</b>      | E373H        | -1.364             | S464A        | -0.788             | R324K        | -0.061             |
| <b>S159G</b> | <b>-3.892</b>      | K170Y        | -2.052             | D49L         | -1.347             | N192Y        | -0.779             | D96T         | -0.054             |
| S174W        | -3.688             | E491K        | -2.011             | <b>G414W</b> | <b>-1.322</b>      | R303N        | -0.751             | K141T        | -0.046             |
| <b>A190W</b> | <b>-3.540</b>      | G280Q        | -1.987             | <b>T476V</b> | <b>-1.315</b>      | <b>T140M</b> | <b>-0.728</b>      | K363V        | -0.044             |
| E126H        | -3.389             | D318H        | -1.951             | F434W        | -1.300             | N155H        | -0.704             | N72S         | -0.039             |
| <b>E257Y</b> | <b>-3.307</b>      | D284V        | -1.925             | E21V         | -1.280             | Y69A         | -0.671             | A77T         | -0.034             |
| V534W        | -3.288             | K404L        | -1.890             | D375G        | -1.267             | L307Y        | -0.645             | A356T        | -0.028             |
| <b>D40W</b>  | <b>-3.227</b>      | Q182I        | -1.842             | D49W         | -1.260             | Q137W        | -0.614             | N351V        | -0.025             |
| <b>A190F</b> | <b>-3.214</b>      | D49A         | -1.818             | A165W        | -1.238             | G129A        | -0.589             | K147Y        | -0.023             |
| <b>E66F</b>  | <b>-3.074</b>      | D248T        | -1.794             | E95I         | -1.236             | D371N        | -0.566             | S59H         | -0.022             |
| Q182L        | -3.039             | D284W        | -1.773             | Y432W        | -1.217             | D248G        | -0.553             | T493K        | -0.021             |
| K404M        | -3.030             | N72M         | -1.771             | Q83W         | -1.191             | N292W        | -0.540             | T227K        | -0.017             |
| D311N        | -3.023             | D375S        | -1.759             | D318V        | -1.175             | L465W        | -0.524             | D371W        | -0.014             |
| N468C        | -2.936             | E172A        | -1.749             | G129S        | -1.145             | D96A         | -0.508             | D355G        | -0.010             |
| E70L         | -2.891             | E360K        | -1.730             | D523C        | -1.121             | D49E         | -0.488             | N155Y        | -0.010             |
| V444T        | -2.858             | D318C        | -1.709             | L478Y        | -1.103             | <b>T13K</b>  | <b>-0.469</b>      | S370T        | -0.009             |
| E491V        | -2.798             | D167V        | -1.685             | K147H        | -1.083             | D167G        | -0.450             | V534N        | -0.009             |
| D318R        | -2.745             | N451S        | -1.684             | D284C        | -1.073             | I18A         | -0.411             | Y299V        | -0.007             |
| K431M        | -2.682             | D49Y         | -1.665             | K437W        | -1.049             | I19A         | -0.374             | E360S        | -0.004             |
| D412H        | -2.664             | L307F        | -1.646             | D318A        | -1.039             | D371S        | -0.351             | E88S         | -0.002             |
| A165T        | -2.642             | D384T        | -1.614             | D479S        | -1.016             | Q497A        | -0.312             | N256C        | -0.002             |
| G280W        | -2.600             | D40G         | -1.590             | D199N        | -0.984             | E257S        | -0.251             | T447N        | -0.001             |
| T68A         | -2.560             | G280A        | -1.563             | E71R         | -0.954             | D10K         | -0.231             | A507K        | -0.001             |

<sup>a</sup> Rosetta ddg\_monomer returns negative value for stabilizing mutations. The greater the absolute value, the greater likelihood to be more stable.

b. Stable mutants identified by both Rosetta and FoldX were shown in bold.



**Table S3 Stable Mutants identified by I-Mutant 3.0**

| Mutants          | FoldX <sup>a</sup> (kcal/mol) | Rosetta<br>ddg_monomer <sup>a</sup> (kcal/mol) | I-Mutant<br>3.0 <sup>b</sup> (kcal/mol) |
|------------------|-------------------------------|------------------------------------------------|-----------------------------------------|
| Thr13Lys         | -0.82                         | -0.47                                          | -0.72                                   |
| Asp40Trp         | -0.54                         | -3.23                                          | -0.28                                   |
| <b>Glu66Phe</b>  | <b>-2.63</b>                  | <b>-3.07</b>                                   | <b>0.32</b>                             |
| Ser93Ile         | -1.91                         | -0.91                                          | -0.25                                   |
| Ala110Pro        | -1.40                         | -2.15                                          | -0.09                                   |
| Thr130Ala        | -0.28                         | -0.21                                          | -1.73                                   |
| Thr140Met        | -1.40                         | -0.73                                          | -0.44                                   |
| Ser159Gly        | -0.92                         | -3.89                                          | -1.19                                   |
| Ala190Phe        | -2.09                         | -3.21                                          | -0.38                                   |
| Ala190Trp        | -1.00                         | -3.54                                          | -0.58                                   |
| Glu257Trp        | -1.28                         | -4.32                                          | -0.22                                   |
| Glu257Tyr        | -0.63                         | -3.31                                          | -0.29                                   |
| Glu341Asn        | -6.42                         | -2.40                                          | -0.79                                   |
| Ser365Ile        | -2.57                         | -3.95                                          | -0.24                                   |
| Ser365Leu        | -3.44                         | -5.01                                          | -0.24                                   |
| Ser365Met        | -3.64                         | -4.02                                          | -0.42                                   |
| Glu373Trp        | -0.64                         | -5.08                                          | -0.23                                   |
| Gly414Trp        | -4.40                         | -1.32                                          | -0.34                                   |
| <b>Asp457Phe</b> | <b>-6.08</b>                  | <b>-12.41</b>                                  | <b>0.09</b>                             |
| <b>Asp457Leu</b> | <b>-4.73</b>                  | <b>-4.71</b>                                   | <b>0.47</b>                             |
| <b>Asp457Met</b> | <b>-4.95</b>                  | <b>-5.15</b>                                   | <b>0.15</b>                             |
| <b>Asp457Tyr</b> | <b>-4.99</b>                  | <b>-11.96</b>                                  | <b>0.07</b>                             |
| <b>Asp457Trp</b> | <b>-4.21</b>                  | <b>-10.03</b>                                  | <b>0.18</b>                             |
| Thr476Val        | -1.58                         | -1.31                                          | -1.02                                   |
| Ser531Arg        | -0.72                         | -1.41                                          | -0.66                                   |

<sup>a</sup> Rosetta ddg\_monomer and FoldX return negative values for stabilizing mutations. The greater the absolute value, the greater likelihood to be more stable.

<sup>b</sup> Positive values predicted by I-Mutant 3.0 indicate that induced mutations are stable.

**Figure S1 Tapp m determination of CRL1 mutants**

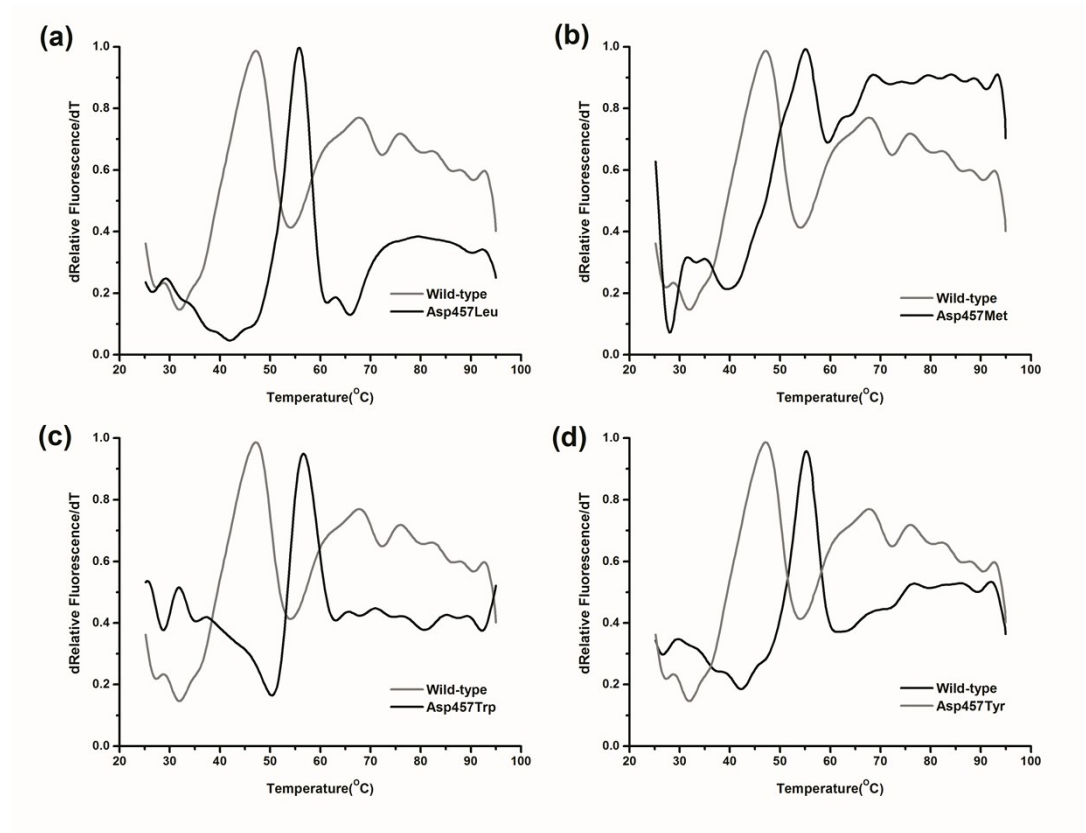

Comparison of normalized apparent melting temperature curve between wild-type Lip1 and mutants. **(a)** wild-type Lip1 (gray line) and Asp457Leu (black line), **(b)** wild-type Lip1 (gray line) and Asp457Met (black line) **(c)** wild-type Lip1 (gray line) and Asp457Trp (black line) **(d)** wild-type Lip1 (gray line) and Asp457Tyr (black line).

Figure S2 Substrate saturation curves of wild-type Lip1 and Asp457Phe

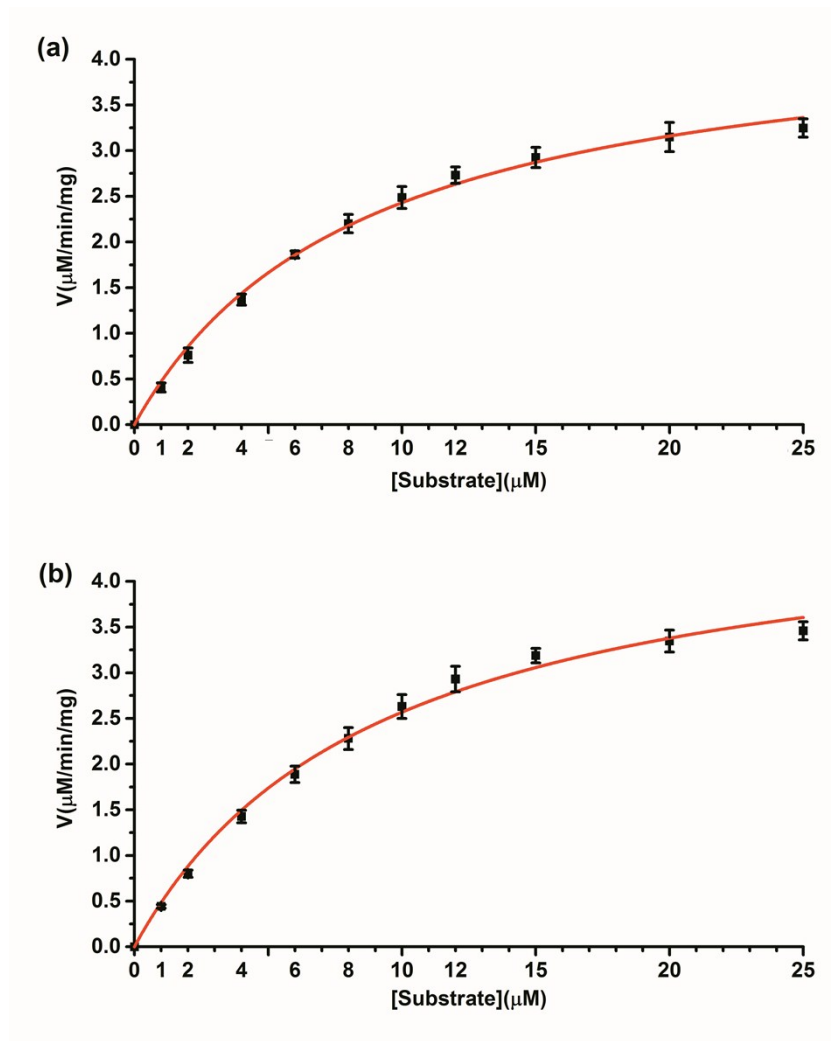

(a) substrate saturation curve of wild-type Lip1, (b) substrate saturation curve of Asp457Phe mutant.

Figure S3 Ramachandran Plot of Asp457Phe

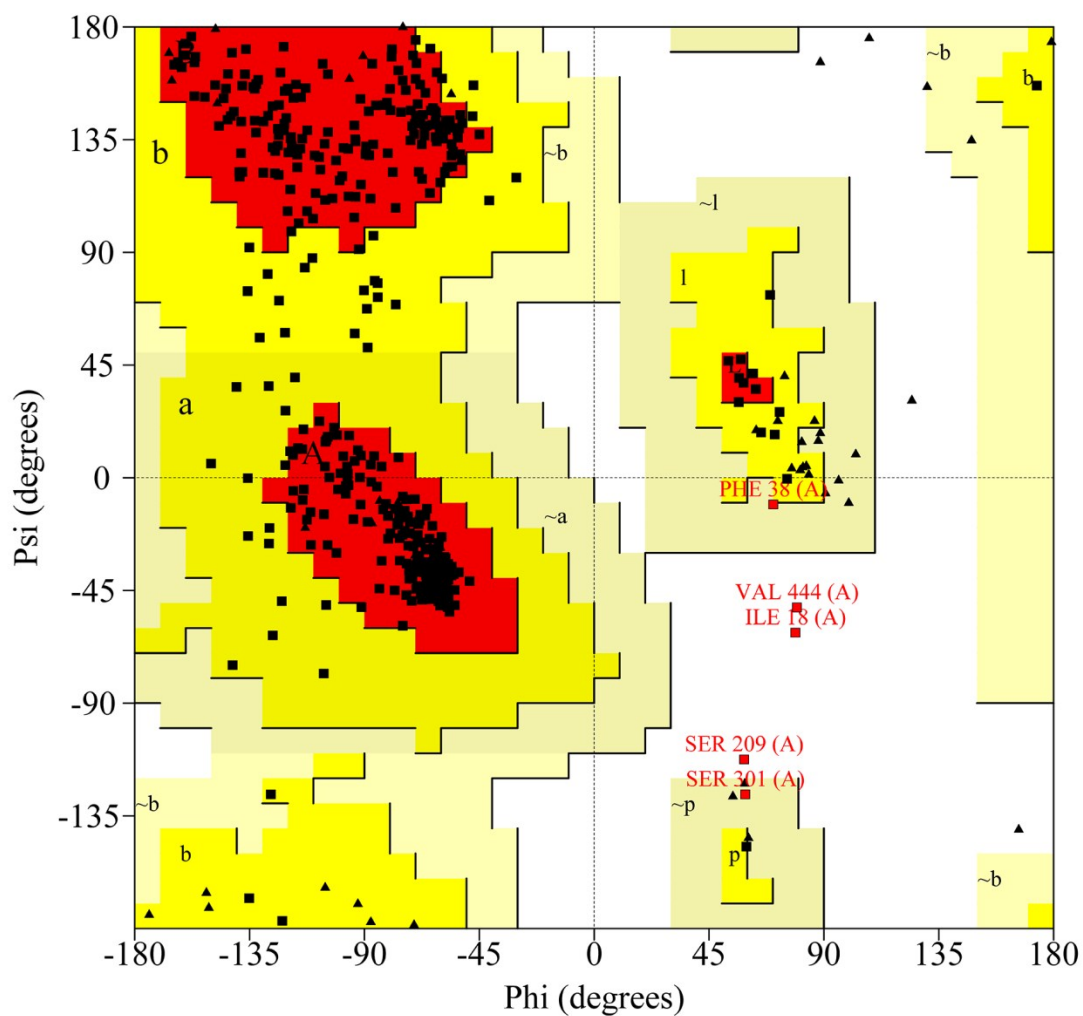

Plot statistics

|                                                      |     |        |
|------------------------------------------------------|-----|--------|
| Residues in most favoured regions [A,B,L]            | 391 | 87.9%  |
| Residues in additional allowed regions [a,b,l,p]     | 49  | 11.0%  |
| Residues in generously allowed regions [~a,~b,~l,~p] | 2   | 0.4%   |
| Residues in disallowed regions                       | 3   | 0.7%   |
| -----                                                |     |        |
| Number of non-glycine and non-proline residues       | 445 | 100.0% |
| Number of end-residues (excl. Gly and Pro)           | 2   |        |
| Number of glycine residues (shown as triangles)      | 56  |        |
| Number of proline residues                           | 31  |        |
| -----                                                |     |        |
| Total number of residues                             | 534 |        |

**Figure S4** Comparison of intermolecular interactions in wild-type Lip1 and Asp457Trp.

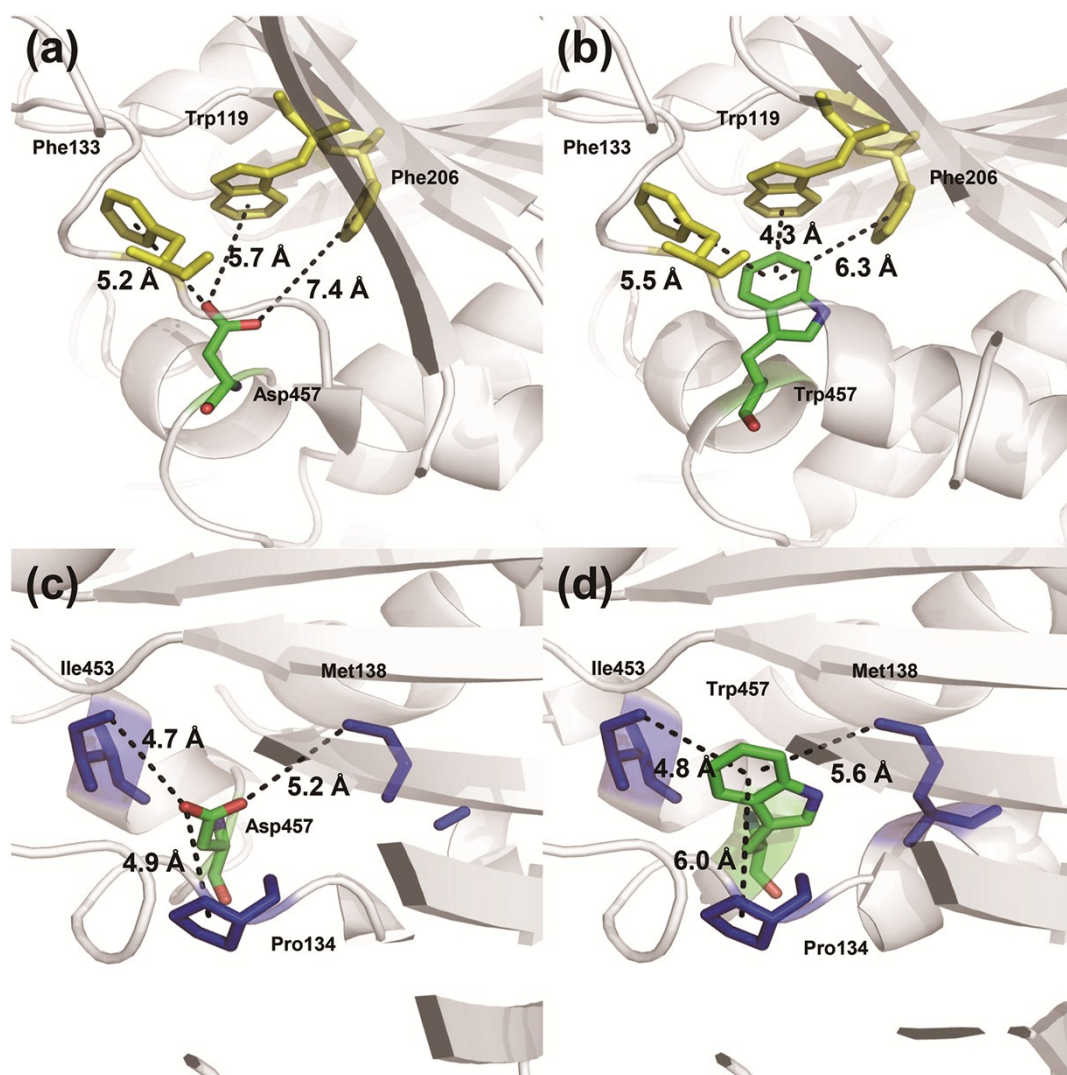

**(a)** The distance between Asp457 (colored by atoms) and aromatic residues nearby (yellow). **(b)** Trp457 (colored by atoms) induced aromatic interactions with Trp119, Phe133 and Phe206 (yellow). **(c)** The distance between Asp457 (colored by atoms) and adjacent hydrophobic residues (blue) **(d)** Trp457 (colored by atoms) induced hydrophobic interactions with Pro134, Met138 and Ile453 (blue).

**Figure S5** Comparison of hydrophobic interactions in wild-type Lip1, Asp457Met, Asp457Leu, and Asp457Tyr.

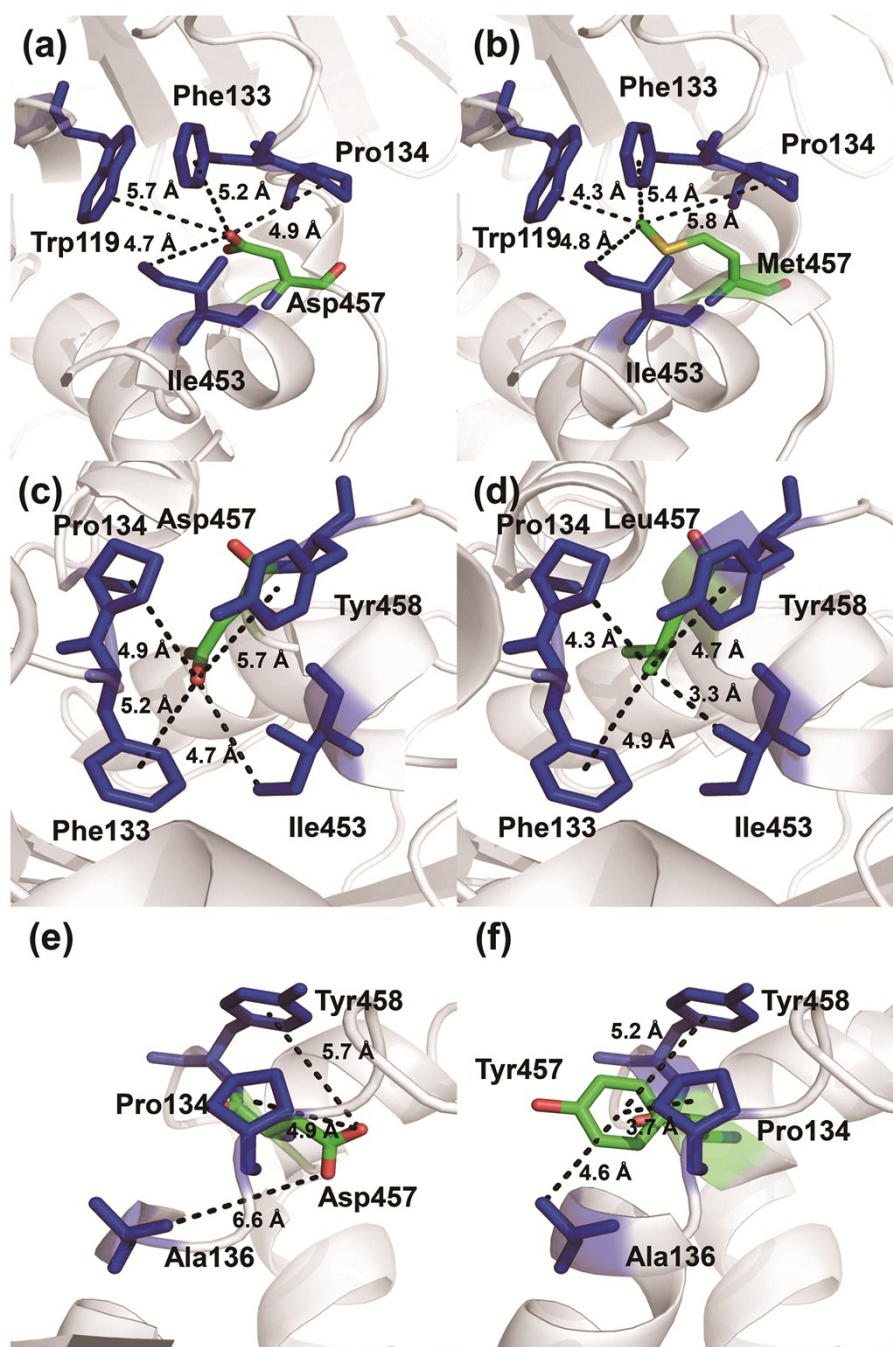

**(a)** The distance between Asp457 (colored by atoms) and adjacent hydrophobic residues (blue). **(b)** Met457 (colored by atoms) induced hydrophobic interactions with Trp119, Phe133, Pro134, and Ile453 (blue). **(c)** The distance between Asp457 (colored by atoms) and adjacent hydrophobic residues (blue). **(d)** Leu457 (colored by atoms) induced hydrophobic interactions with Phe133, Pro134, Ile453 and Tyr458 (blue). **(e)** The distance between Asp457 (colored by atoms) and adjacent hydrophobic residues (blue) **(f)** Tyr457 (colored by atoms) induced hydrophobic interactions with Pro134, Ala136 and Tyr458 (blue).
